# Supplementary material for: Osteoclastogenic Potential of Tissue-Engineered Periosteal Sheet: Effects of Culture Media on the Ability to Recruit Osteoclast Precursors
Source: MDPI journal article supplement (doi:10.3390/ijms22042169), 2021-02-22
Supplement: s1 [file s1]

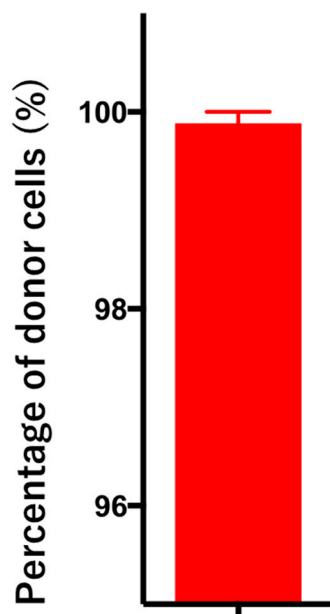

**Figure S1.** Donor chimerism at five weeks after BMT. Hematopoietic chimerism on blood was measured by Flow cytometric analysis five weeks post BMT. Anti-H-2b (AF6-88.5) and H-2d (SF1-1.1) antibodies were sourced by BioLegend (San Diego, CA, USA). Mean  $\pm$  SD is shown. N = 6.

**Table S1.** Blood counts at five weeks after BMT.

| White blood cells (per $\mu$ L) | Hemoglobin (g/dL) | Platelets (per $\mu$ L) |
|---------------------------------|-------------------|-------------------------|
| 8376 $\pm$ 3397                 | 16.2 $\pm$ 1.0    | 133.3 $\pm$ 21.5        |

Mean  $\pm$  SD is shown. N = 21.
